# Supplementary material
Source: PubMed Central journal article supplement (PMC2759827)
Supplement: supp_M900013-JLR200_Suppdata.pdf [file supp_M900013-JLR200_Suppdata.pdf]

**Supplemental Table 1.** Sequences of oligonucleotide primers

| Gene Name | Forward                | Reverse               |
|-----------|------------------------|-----------------------|
| Pctp      | CCAGAGTATCTCGGCACCTC   | ACGCTTTCACCATGTCCTTC  |
| Pgc1a     | TGCCCAGATCTTCCTGAACT   | TCTGTGAGAACCGCTAGCAA  |
| Pparg     | CTCCTGTTGACCCAGAGCAT   | GAATGCGAGTGGTCTTCCAT  |
| Ppara     | GTGGCTGCTATAATTTGCTGTG | GAAGGTGTCATCTGGATGGTT |
| Ucp1      | TCAGGATTGGCCTCTACGAC   | TGCATTCTGACCTTCACGAC  |
| Tfam      | TAGGAAAATTGCAGCCCTGT   | CCTTCTCCATAACCCATCAGC |
| Nrf1      | CCACGTTGGATGAGTACACG   | CGGCAGCTCTGAATTAACCT  |
| Them2     | TCGACCATGGCTCTAATGTG   | TCCTGTGGTCTTGTTGGTCA  |
| Rpl32     | CACCAGTCAGACCGATATGT   | TTCTCCGCACCCTGTTG     |

\*Abbreviations: Pctp, phosphatidylcholine transfer protein; Pgc, peroxisome proliferator activate receptor  $\gamma$  coactivator; Ppar, peroxisome proliferator activate receptor; Ucp, uncoupling protein; Tfam, mitochondrial transcription factor A; Nrf, nuclear respiratory factor; Them, thioesterase superfamily member; Rpl32, L32 ribosomal protein.
